# Supplementary material
Source: publisher site journal article supplement (https://www.dovepress.com/get_supplementary_file.php?f=384038.docx)
Supplement: Supplementary file 1 [file get_supplementary_file.php]

**Supplement Table 1.** Relationship between MRI and patient-reported outcomes in RRMS and PMS subgroups

| **Disability outcome** | **Predictive Variable in CIS/RRMS** | **Wald** | **p-value** | **Predictive Variable in PMS** | **Wald** | **p-value** |
| --- | --- | --- | --- | --- | --- | --- |
| Standing up from low seat | BDI-FS | 19.67 | **<0.001** | T1-LV | 3.932 | **0.047** |
| Caudate | 9.771 | **0.002** | **-** | **-** | **-** |
| Climbing stairs | BDI-FS | 12.965 | **<0.001** | Putamen | 4.383 | **0.036** |
| Caudate | 4.264 | **0.039** | Globus pallidus | 4.462 | **0.035** |
| Standing | BDI-FS | 7.975 | **0.005** | T1-LV | **3.966** | **0.047** |
| Lower limb limitation | BDI-FS | 11.561 | **0.001** | T1-LV | 10.394 | **0.001** |
| - | - | **-** | T2-LV | 4.395 | **0.036** |
| - | - | **-** | Putamen | 4.419 | **0.036** |
| Upper limb limitation | BDI-FS | 13.805 | **<0.001** | **-** | **-** | **-** |
| GMV | 7.19 | **0.007** | **-** | **-** | **-** |
| Bladder continence | Age | 6.312 | **0.012** | Age | 3.857 | **0.049** |
| LVV | 4.626 | **0.031** | BDI-FS | 7.533 | **0.006** |
| **-** | **-** | **-** | T1-LV | 6.124 | **0.013** |
| **-** | **-** | **-** | LVV | 7.076 | **0.008** |
| **-** | **-** | **-** | Globus pallidus | 5.797 | **0.016** |
| Bowel continence | **-** | **-** | **-** | Age | 5.205 | **0.011** |
| **-** | **-** | **-** | WMV | 4.98 | **0.026** |
| Fatiguability | BDI-FS | 8.834 | **0.003** | Age | 7.374 | **0.007** |
| **-** | **-** | **-** | WMV | 5.763 | **0.016** |
| **-** | **-** | **-** | GMV | 3.999 | **0.046** |
| Life satisfaction | BDI-FS | 13.655 | **<0.001** | BDI-FS | 5.828 | **0.016** |

**Legend:** CIS/RRMS – clinically isolated syndrome/relapsing-remitting multiple sclerosis, PMS – progressive multiple sclerosis, BDI-FS - Beck Depression Inventory – Fast Screen, EDSS – Expanded Disability Status Scale, LV – lesion volume, GMV – gray matter volume, LVV – lateral ventricular volume, WMV – white matter volume.

Ordinal regression models were performed where the limitations in each of the PRO questions are individually tested. The regression utilized 14 independent predictors including: age, BDI-FS, T1 and T2 lesion volume, whole brain volume, gray matter volume, white matter volume, lateral ventricular volume, deep gray matter volume, and specific volumes of the thalamus, caudate, putamen globus pallidus and hippocampus. Only significant MRI-based volumes from the model were included in the Table. The Wald statistics demonstrate the significance of individual coefficients in the model P-values lower than 0.05 was considered significant and shown in bold.
